# Supplementary material
Source: Springer Nature journal article supplement (https://www.springermedizin.de/resource/supplementary/12885_2013_4097_MOESM2_ESM.pdf/9465330)
Supplement: MOESM2 [file 9465330]

**A**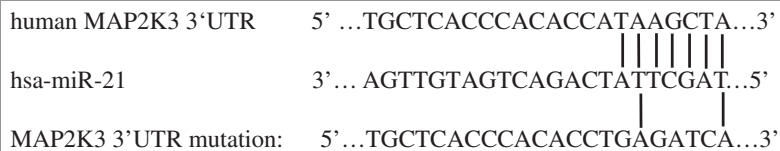**B**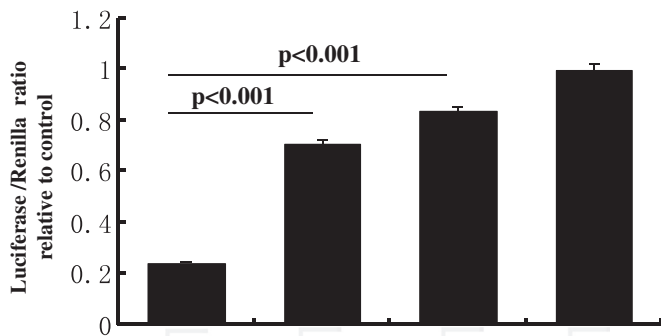

pAd/pri-miR-21

pAd/con

pMIR-Report / MAP2K3

pMIR-Report / Mut-MAP2K3

pMIR-report

**C**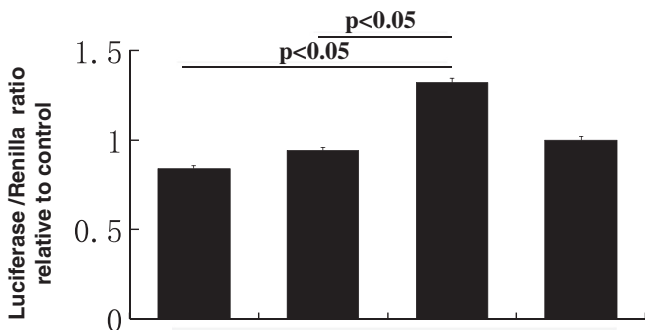

pAd/miR-21/inhibitor

pAd/con

pMIR-Report / MAP2K3

pMIR-Report / Mut-MAP2K3

pMIR-report
